# Supplementary material for: Measurement of perineal tears as an additional tool for laceration assessment during vaginal birth
Source: Eur J Midwifery. 2023 Dec 20;7:43. doi: 10.18332/ejm/174310 (PMC10731751; doi:10.18332/ejm/174310)
Supplement: Supplementary file 1 [file EJM-7-43-s1.pdf]

## Data collection instrument

Name \_\_\_\_\_ Form Nr. \_\_\_\_\_

Date and time of hospitalization \_\_\_\_\_ Medical record nr \_\_\_\_\_

### General data

Age \_\_\_\_\_ Schooling \_\_\_\_\_ Occupation \_\_\_\_\_

Skin color: yellow ☐ caucasian ☐ black ☐ brown ☐

### Skin and perineum health history

Previous episiotomy no ☐ yes ☐ Nr: \_\_\_\_\_

Other scars no ☐ yes ☐ Cause: \_\_\_\_\_

Vulvar varices no ☐ yes ☐

Hemorrhoids no ☐ yes ☐

Local infections no ☐ yes ☐

### Obstetric History

Gestation nr: \_\_\_\_\_ Parity \_\_\_\_\_ Abortions \_\_\_\_\_ Number of children \_\_\_\_\_

Professional who performed the delivery:

NM ☐ ObGyn ☐ Resident ☐ Midwife ☐

[NM: nurse midwife; ObGyn: obstetrician gynecologist; Resident: Medical Resident]

### Tear assessment

Total number of tears \_\_\_\_\_

Location of tear 1 \_\_\_\_\_ Location of tear 2 \_\_\_\_\_

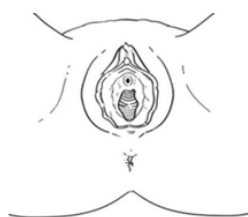

Length \_\_\_\_\_

Width \_\_\_\_\_

Depth \_\_\_\_\_

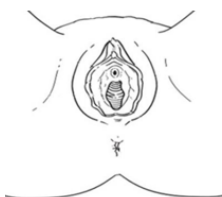

Length \_\_\_\_\_

Width \_\_\_\_\_

Depth \_\_\_\_\_

Location of tear 3 \_\_\_\_\_ Location of tear 4 \_\_\_\_\_

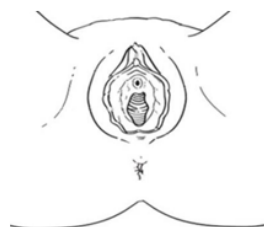

Length \_\_\_\_\_

Width \_\_\_\_\_

Depth \_\_\_\_\_

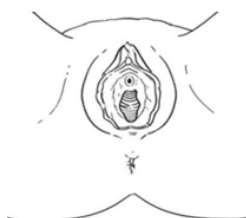

Length \_\_\_\_\_

Width \_\_\_\_\_

Depth \_\_\_\_\_

Location of tear 5 \_\_\_\_\_ Location of tear 6 \_\_\_\_\_

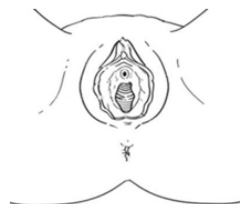

Length \_\_\_\_\_

Width \_\_\_\_\_

Depth \_\_\_\_\_

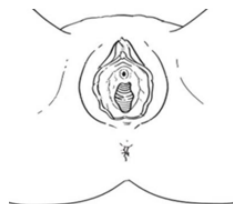

Length \_\_\_\_\_

Width \_\_\_\_\_

Depth \_\_\_\_\_

**General aspect**

Bleeding: absent ☐ light ☐ moderate ☐ excessive ☐

Edema (adapted REEDA scale):

(-) absent ☐ (+) small [less than 1 cm from the incision] ☐ (++) moderate [perineal or vulvar 1-2 cm from the incision] ☐ (+++) large [perineal or vulvar beyond 2 cm of the incision] ☐

Hematoma no ☐ yes ☐

**Tear classification (professional assessment)**

1<sup>st</sup> grade ☐ 2<sup>nd</sup> grade ☐

**Post trauma immediate procedures**

Bleeding control by compression no ☐ yes ☐

Suture no ☐ yes ☐

Thread used \_\_\_\_\_ Surgical glue \_\_\_\_\_

Type of suture: total continuous ☐ continuous in the mucosa; muscle and skin separate stitches ☐ modified continuous (only separate stitches on muscle) ☐

**Guidelines on postpartum tear care offered by the professional (describe)**

Researcher name \_\_\_\_\_
